# Supplementary material for: TiO2-coated LiCoO2 electrodes fabricated by a sputtering deposition method for lithium-ion batteries with enhanced electrochemical performance
Source: Royal Society of Chemistry journal article supplement (doi:10.1039/c8ra10451d), 2019-01-01
Supplement: c8ra10451d1.pdf [file c8ra10451d1.pdf]

## Supporting Information

### **Enhanced performance of LiCoO<sub>2</sub>-TiO<sub>2</sub> electrode fabricated by sputtering for lithium ion battery**

Sang-Hyun Moon,<sup>a</sup> Min-Cheol Kim,<sup>a</sup> Eun-Soo Kim,<sup>a</sup> Yeon-Kyung Shin,<sup>a</sup> Ji-Eun Lee,<sup>a</sup>  
Sojeong Choi,<sup>a</sup> Kyung-Won Park<sup>a,\*</sup>

<sup>a</sup> Department of Chemical Engineering, Soongsil University, Seoul 06987, Republic of Korea

Tel: 82-2-820-0613. Fax: 82-2-812-5378.

E-mail address: kwpark@ssu.ac.kr.

Supporting materials include:

Part I. Supplementary figures

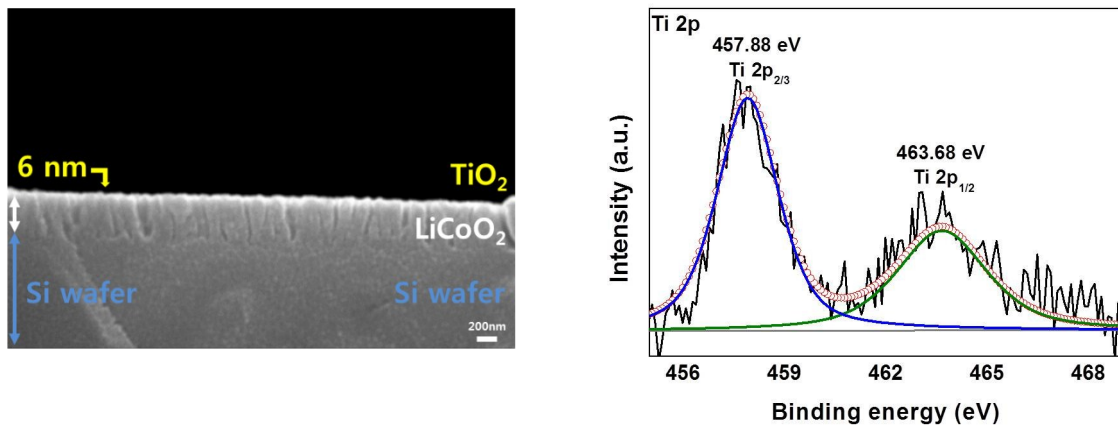

**Figure S1.** Ex-situ SEM cross-section image (left) and Ti2p XPS spectrum (right) of LCO-TiO<sub>2</sub>(90).

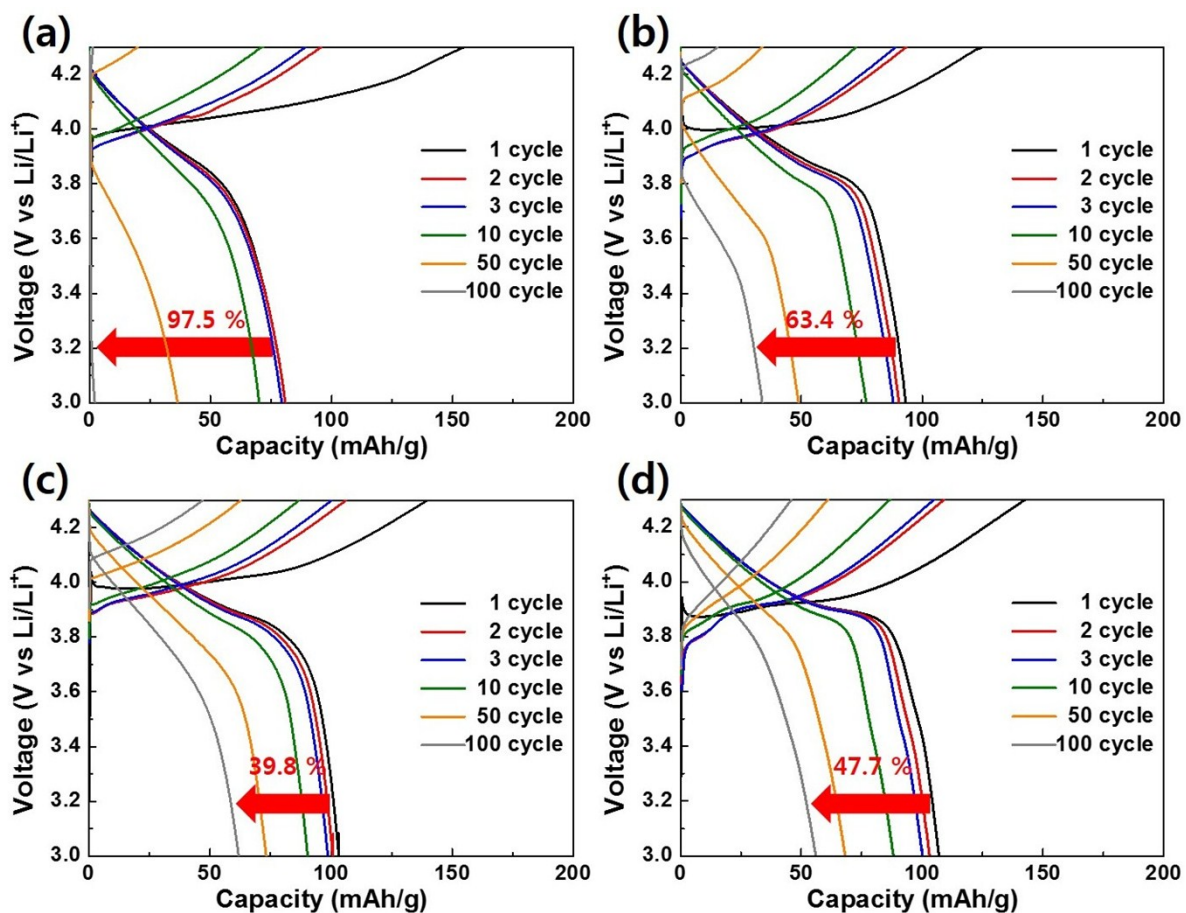

**Figure S2.** Charge/discharge curves of (a) LCO-TiO<sub>2</sub>(0), (b) LCO-TiO<sub>2</sub>(60), (c) LCO-TiO<sub>2</sub>(90) and (d) LCO-TiO<sub>2</sub>(120) measured at 0.5 C in the potential range of 3.01-4.30 V vs. Li/Li<sup>+</sup>.

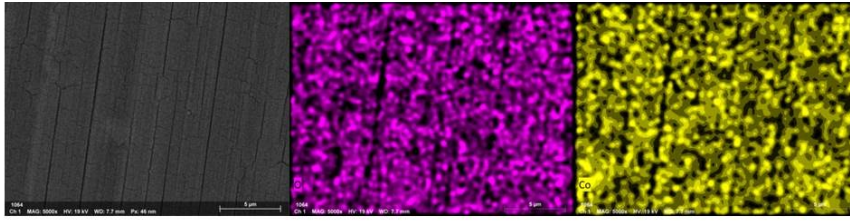

(b)

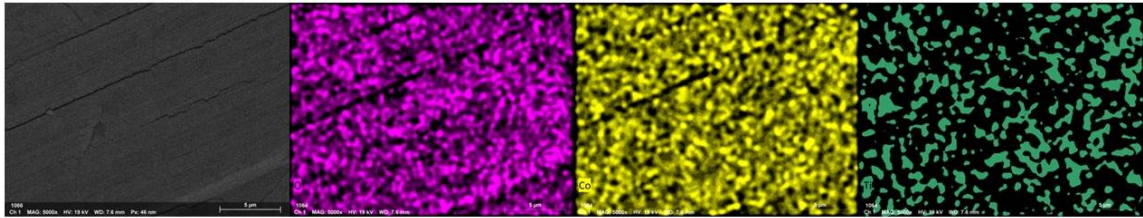

(c)

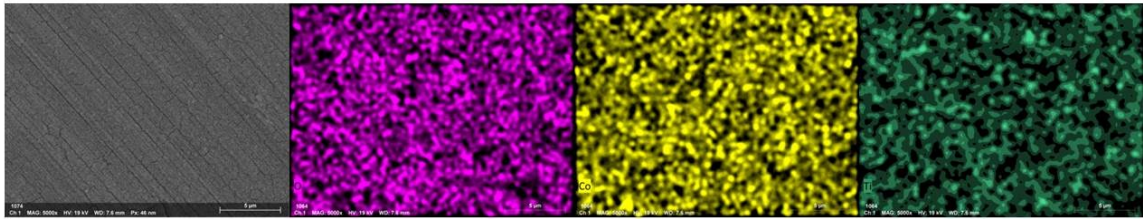

(d)

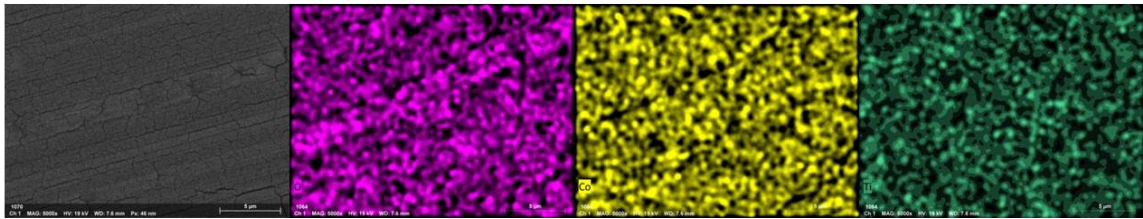

**Figure S3.** EDX mapping images of the as-prepared (a) LCO-TiO<sub>2</sub>(0), (b)LCO-TiO<sub>2</sub>(60), (C)LCO-TiO<sub>2</sub>(90) and (d)LCO-TiO<sub>2</sub>(120).

**Table S1.** Elemental composition from EDS data of LCO-TiO<sub>2</sub>(0), LCO-TiO<sub>2</sub>(60), LCO-TiO<sub>2</sub>(90) and LCO-TiO<sub>2</sub>(120)

|              | <b>LCO-TiO<sub>2</sub>(0)</b> | <b>LCO-TiO<sub>2</sub>(60)</b> | <b>LCO-TiO<sub>2</sub>(90)</b> | <b>LCO-TiO<sub>2</sub>(120)</b> |
|--------------|-------------------------------|--------------------------------|--------------------------------|---------------------------------|
|              | <b>At (%)</b>                 | <b>At (%)</b>                  | <b>At (%)</b>                  | <b>At (%)</b>                   |
| <b>Co</b>    | <b>26.03</b>                  | <b>25.70</b>                   | <b>25.71</b>                   | <b>25.76</b>                    |
| <b>Ti</b>    | <b>0</b>                      | <b>0.03</b>                    | <b>0.06</b>                    | <b>0.08</b>                     |
| <b>O</b>     | <b>73.97</b>                  | <b>74.27</b>                   | <b>74.23</b>                   | <b>74.16</b>                    |
| <b>Total</b> | <b>100.00</b>                 | <b>100.00</b>                  | <b>100.00</b>                  | <b>100.00</b>                   |

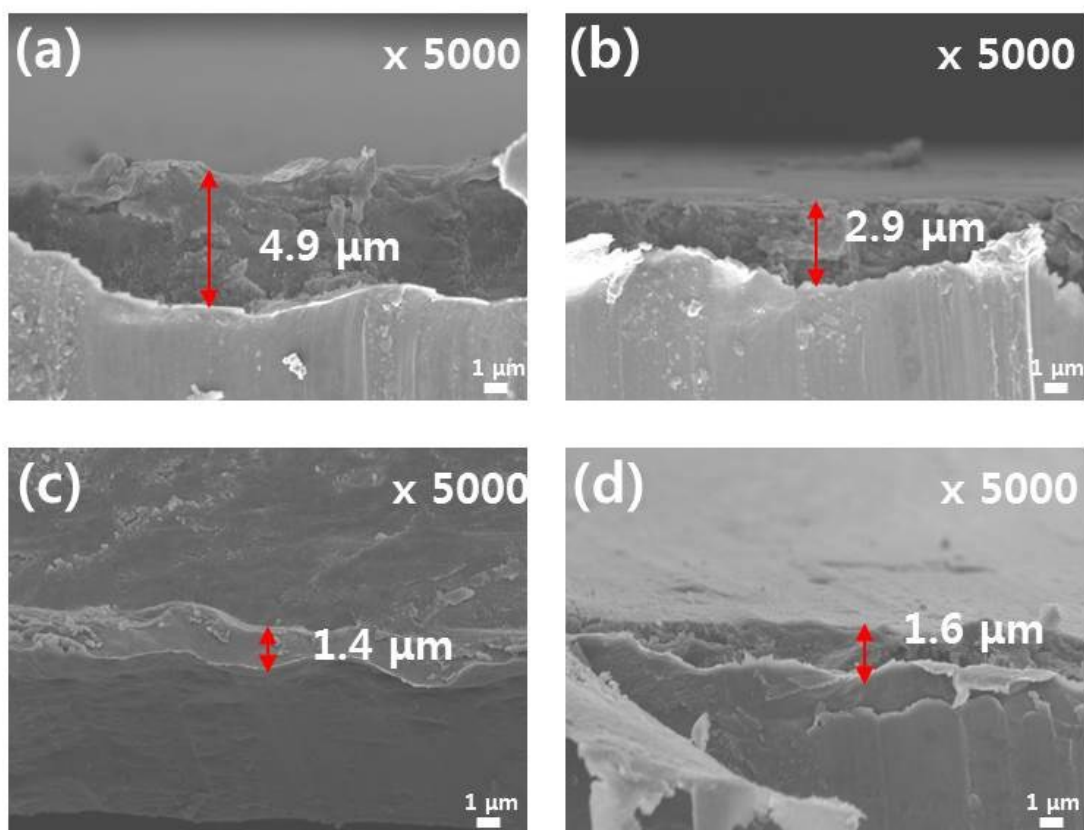

**Figure S4.** cross-section SEM images of (a) LCO-TiO<sub>2</sub>(0), (b)LCO-TiO<sub>2</sub>(60), (C)LCO-TiO<sub>2</sub>(90) and (d)LCO-TiO<sub>2</sub>(120) after charging/discharging process.

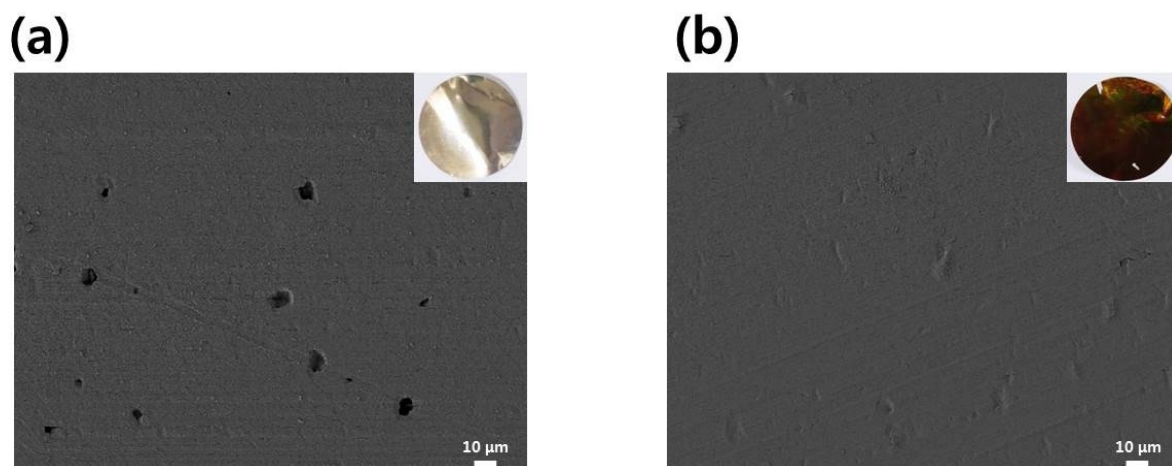

**Figure S5** Ex-situ SEM top-view images of (a)LCO-TiO<sub>2</sub>(0) and (b)LCO-TiO<sub>2</sub>(90) after charging/discharging process in the potential range of 3.01-4.50 V vs. Li/Li<sup>+</sup>. The insets are photo images of LCO-TiO<sub>2</sub>(0) and LCO-TiO<sub>2</sub>(90) after the cycling process.

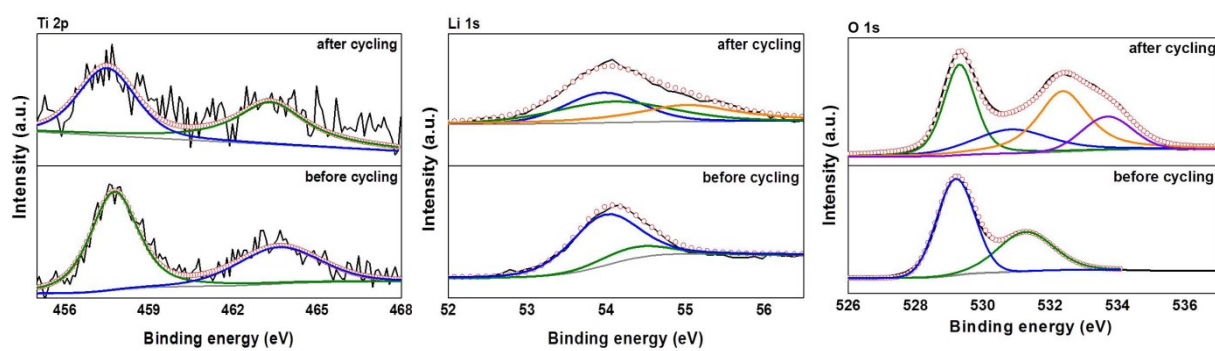

**Figure S6** Ti2p, Li1s, and O1s XPS spectra of LCO-TiO<sub>2</sub>(90) after charging/discharging process in the potential range of 3.01-4.50 V vs. Li/Li<sup>+</sup>.
